# Supplementary material
Source: Springer Nature journal article supplement (https://www.springermedizin.de/resource/supplementary/12943_2009_521_MOESM3_ESM.pdf/9555004)

**A**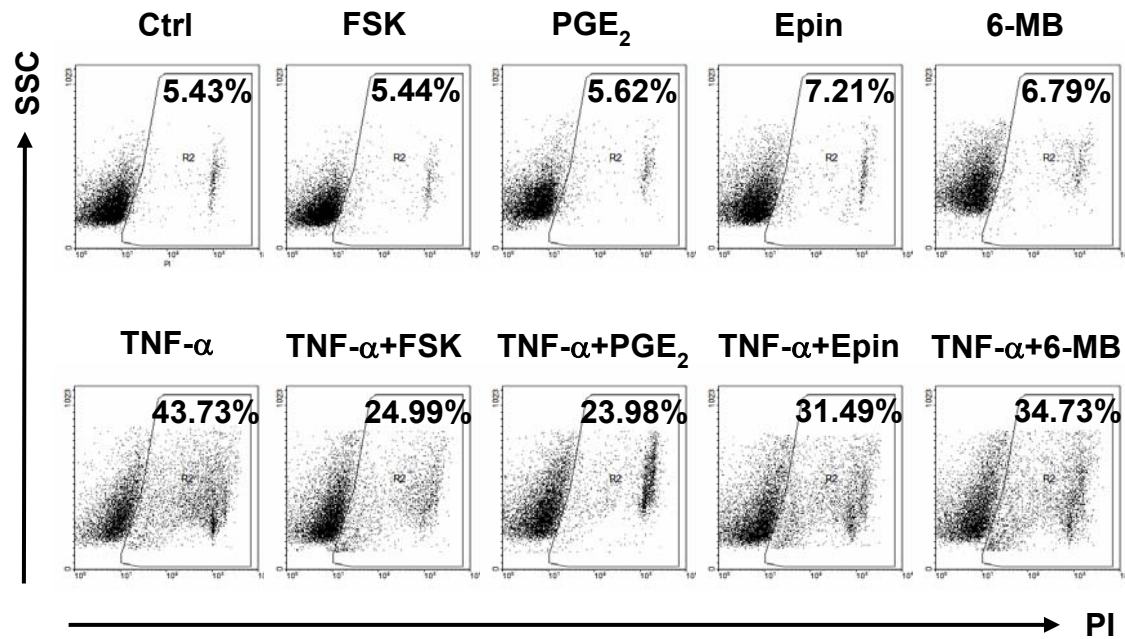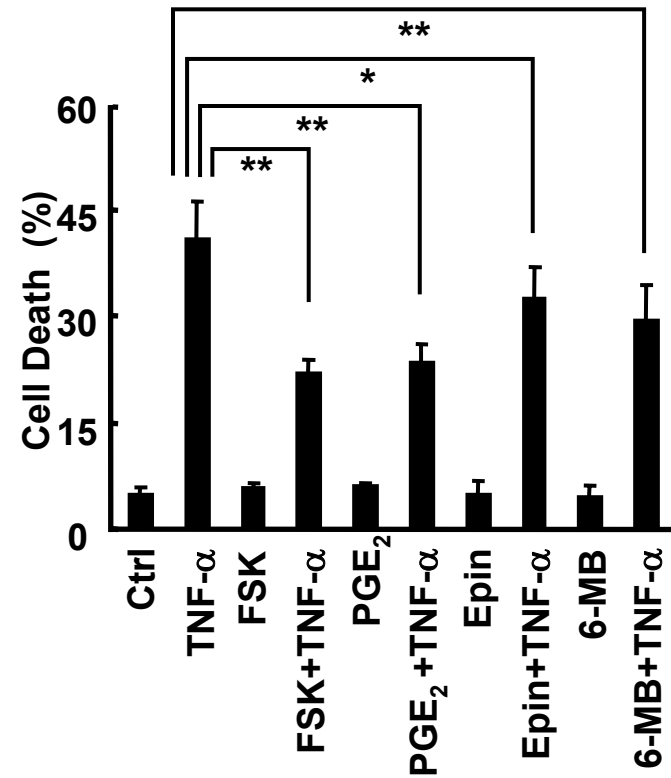**B**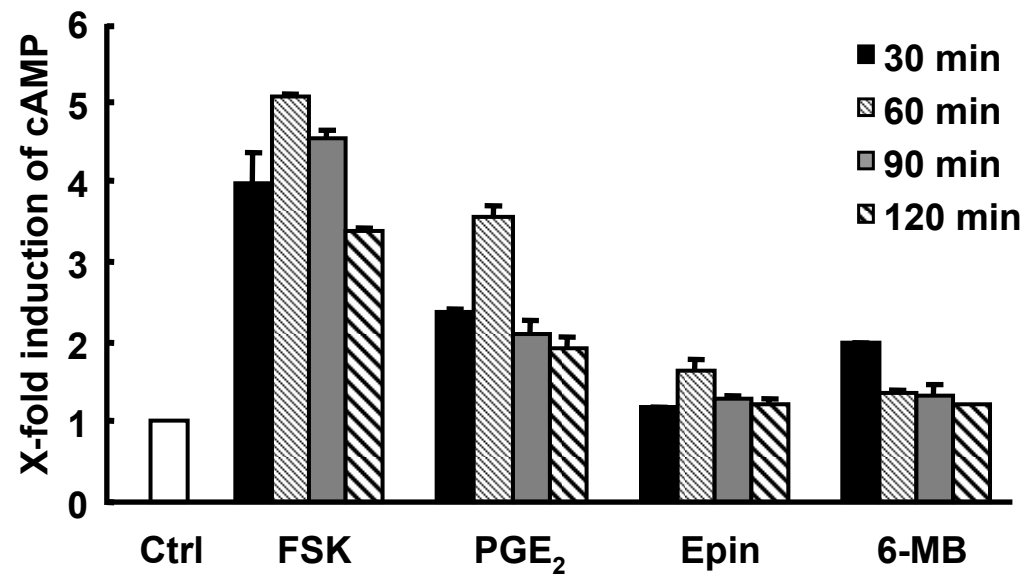

Supplement: MOESM3 [file 9555004]
